# Supplementary material for: Superior spatial resolution in confocal X-ray techniques using collimating channel array optics: elemental mapping and speciation in archaeological human bone
Source: Royal Society of Chemistry journal article supplement (doi:10.1039/c6ja00297h), 2017-01-01
Supplement: c6ja00297h1.pdf [file c6ja00297h1.pdf]

## Electronic Supplementary Information

*Journal of Analytical Atomic Spectrometry*

### Superior Spatial Resolution in Confocal X-ray Techniques Using Collimating Channel Array Optics: Elemental Mapping and Speciation in Archaeological Human Bone

S. Choudhury,<sup>a</sup> D. N. Agyeman-Budu,<sup>b</sup> A. R. Woll,<sup>b</sup> T. Swanston,<sup>c</sup> T. L. Varney,<sup>d</sup> D. M. L. Cooper,<sup>e</sup> E. Hallin,<sup>f</sup> G. N. George,<sup>ah</sup> I. J. Pickering\*<sup>ah</sup> and I. Coulthard\*<sup>g</sup>

<sup>a</sup> Department of Geological Sciences, University of Saskatchewan, Saskatoon, Saskatchewan S7N 5E2, Canada. Fax:+1 306 966 8593; Tel:+1 306 966 5706; E-mail: [ingrid.pickering@usask.ca](mailto:ingrid.pickering@usask.ca)

<sup>b</sup> Cornell High Energy Synchrotron Source, Cornell University, Ithaca, New York 14853, USA

<sup>c</sup> Department of Archaeology and Anthropology, University of Saskatchewan, Saskatoon, Saskatchewan S7N 5B1, Canada

<sup>d</sup> Department of Anthropology, Lakehead University, Thunder Bay, Ontario P7B 5E1, Canada

<sup>e</sup> Department of Anatomy and Cell Biology, University of Saskatchewan, Saskatoon, Saskatchewan S7N 5E5, Canada

<sup>f</sup> Plant Phenotyping and Imaging Research Centre, University of Saskatchewan, Saskatoon, Saskatchewan S7N 5C9, Canada

<sup>g</sup> Canadian Light Source Inc., 44 Innovation Boulevard, Saskatoon, Saskatchewan S7N 2V3, Canada. Fax:+1 306 657 3535; Tel:+1 306 657 3526; E-mail: [Ian.Coulthard@lightsource.ca](mailto:Ian.Coulthard@lightsource.ca)

<sup>h</sup> Department of Chemistry, University of Saskatchewan, Saskatoon, Saskatchewan S7N 5C9, Canada

**Table S1.**

Table shows count rates ( $s^{-1}$ ) recorded by the fluorescence detector. The *low* fluorescent count rates represent typical lowest level values observed in the maps of Figure 2, excluding values originating from outside of the sample. Likewise, the *high* values represent the highest observed count rates, excluding anomalous hot spots. Since the sample is highly heterogeneous with respect to the distributions of Pb or Sr, and the areas investigated within the sample for various setups were chosen arbitrarily, the Ca/Pb or Sr/Pb ratios do not carry any significance.

|           | Conventional |             | Polycapillary |             | CCA (7 $\mu\text{m}$ ) |             | CCA (2.5 $\mu\text{m}$ ) |             |
|-----------|--------------|-------------|---------------|-------------|------------------------|-------------|--------------------------|-------------|
|           | <i>Low</i>   | <i>High</i> | <i>Low</i>    | <i>High</i> | <i>Low</i>             | <i>High</i> | <i>Low</i>               | <i>High</i> |
| <b>Ca</b> | 108          | 8478        | 20            | 41850       | 330                    | 20160       | 1618                     | 30040       |
| <b>Pb</b> | 106          | 12680       | 20            | 5340        | 28                     | 2228        | 54                       | 1784        |
| <b>Sr</b> | 1320         | 72662       | 20            | 2160        | 280                    | 2828        | 86                       | 1624        |
